# Supplementary material for: Polydopamine-based superhydrophobic membranes for biofuel recovery
Source: Royal Society of Chemistry journal article supplement (doi:10.1039/c3ta12001e), 2013-01-01
Supplement: c3ta12001e.pdf [file c3ta12001e.pdf]

## **Supporting Information**

### **Polydopamine-Based Superhydrophobic Membranes for Biofuels Recovery**

Qian Liu, Bingxin Huang, and Aisheng Huang

Institute of New Energy Technology, Ningbo Institute of Material Technology and Engineering,  
CAS, 519 Zhuangshi Road, 315201 Ningbo, P. R. China.

**Figure S1**

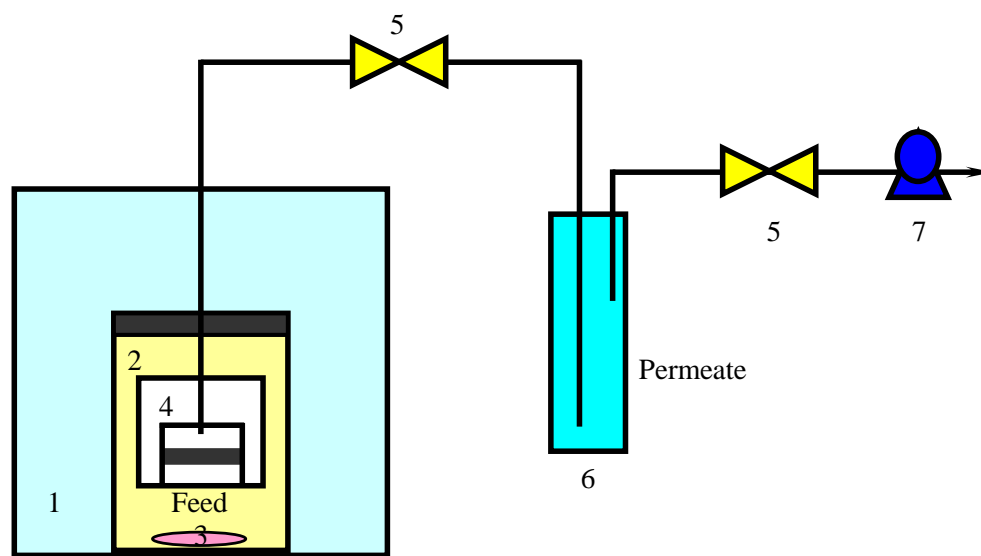

**Figure S1.** Schematic diagram of experimental apparatus for pervaporation. (1) water bath; (2) liquid tank; (3) stirrer; (4) membrane model; (5) ball valve; (6) cold trap; (7) vacuum pump

**Figure S2**

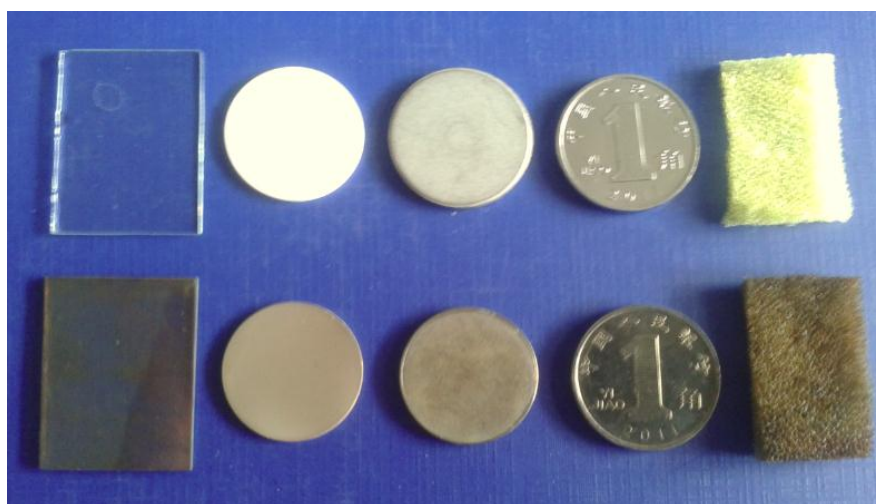

**Figure S2.** Photographs of various non-modified (top) and polydopamine-modified substrates (bottom). From left to right: glass plate, alumina disk, stainless steel disk, Chinese coin, and sponge.

**Figure S3**

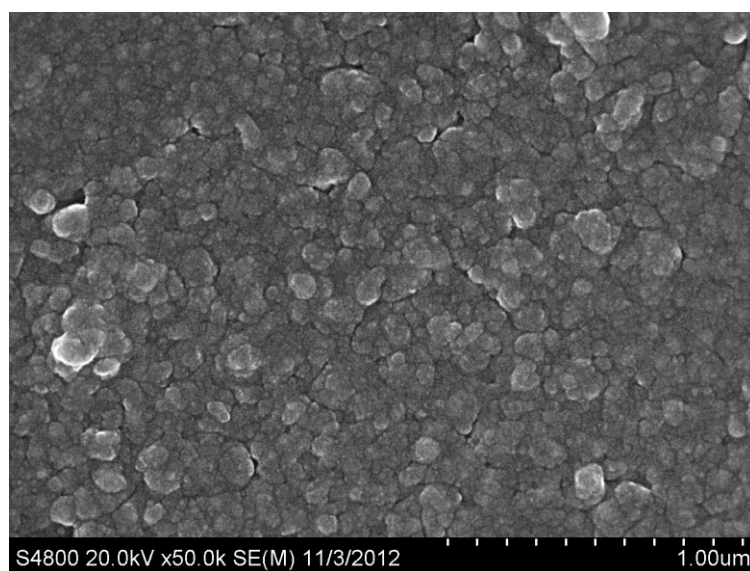

**Figure S3.** Top view SEM image of the PD layer on the Al<sub>2</sub>O<sub>3</sub> disk.

**Figure S4**

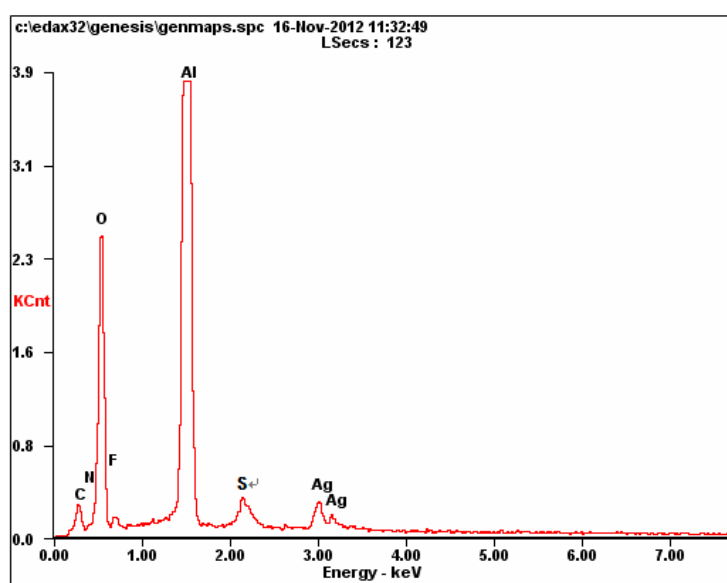

**Figure S4.** EDXS pattern of the F-Ag-PD@Al<sub>2</sub>O<sub>3</sub> membrane.

## Figure S5

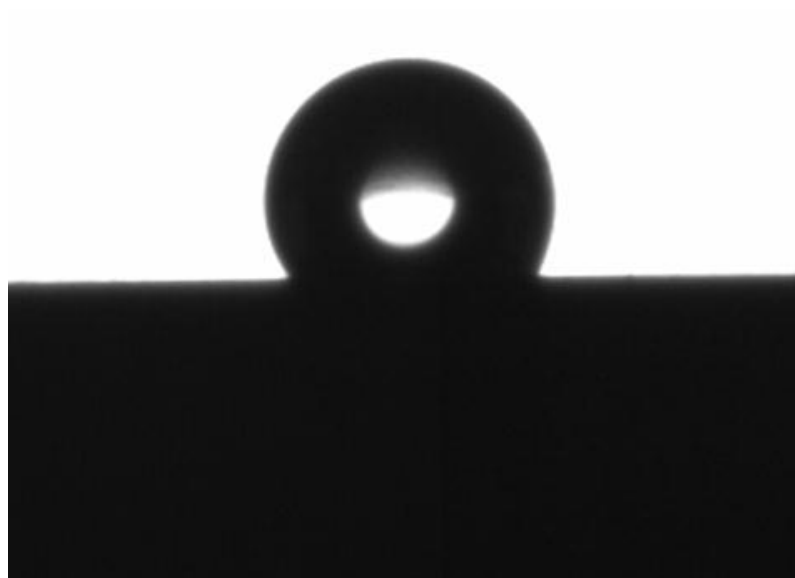

**Figure S5.** Photograph of a water droplet standing on the surface of F-PD@Al<sub>2</sub>O<sub>3</sub> layer, i.e., the PD layer was directly modified with 1H, 1H, 2H, 2H-perfluorodecanethiol (without react with Ag<sup>+</sup>), showing a water CA of about 132 °.

**Figure S6**

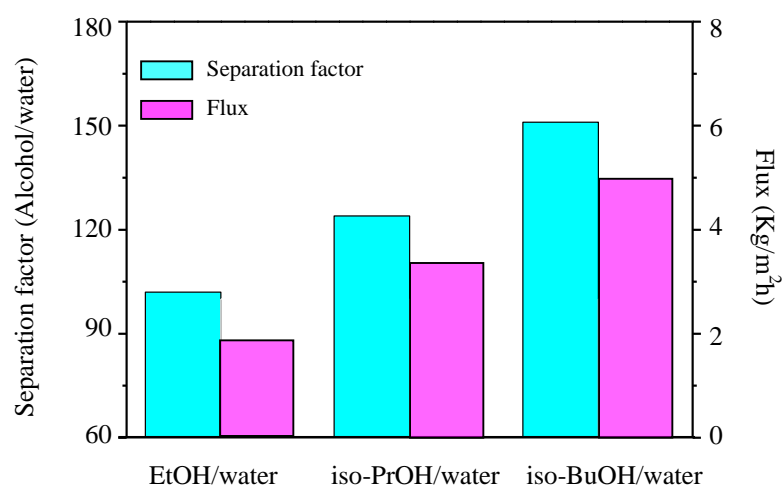

**Figure S6.** Separation factor and flux of the F-Ag-PD@Al<sub>2</sub>O<sub>3</sub> superhydrophobic membrane for the separation of different alcohols at 50 °C with alcohols concentration of 5.0 wt.% in feed.

**Table S1**

**Table S1.** Comparison of the pervaporation performances for the separation of alcohol/water.

| Membrane                                        | Membrane thickness (μm) | Feed <sup>a</sup> (wt.%) | Temperature (°C) | Alcohol/water separation       |                                                       | Reference |
|-------------------------------------------------|-------------------------|--------------------------|------------------|--------------------------------|-------------------------------------------------------|-----------|
|                                                 |                         |                          |                  | Flux [(Kg/(m <sup>2</sup> h))] | Separation factor ( $\alpha_{\text{alcohol/water}}$ ) |           |
| Silicalite-1                                    | /                       | 5 <sup>b</sup>           | 30               | 0.22                           | 59                                                    | 1         |
| Silicalite-1                                    | 20                      | 5 <sup>b</sup>           | 60               | 0.9                            | 106                                                   | 2         |
| Silicalite-1                                    | 25                      | 4.65 <sup>b</sup>        | 30               | 0.5                            | 64                                                    | 3         |
| Silicalite-1                                    | 12                      | 3 <sup>b</sup>           | 60               | 2.9                            | 66                                                    | 4         |
| Silicalite-1                                    | 30                      | 3 <sup>b</sup>           | 60               | 0.58                           | 95                                                    | 5         |
| ZSM-5                                           | 20                      | 5 <sup>b</sup>           | 60               | 0.97                           | 62                                                    | 6         |
| Ge-ZSM-5                                        | /                       | 5 <sup>b</sup>           | 30               | 0.22                           | 47                                                    | 7         |
|                                                 |                         | 5 <sup>c</sup>           | 30               | 0.02                           | 19                                                    |           |
| PTMSP                                           | 22                      | 1.5 <sup>c</sup>         | 70               | 1.03                           | 70                                                    | 8         |
|                                                 |                         | 6 <sup>c</sup>           | 25               | 0.436                          | 61                                                    |           |
| PVDF                                            | 110                     | 7.5 <sup>c</sup>         | 40               | 2.34                           | 5.2                                                   | 9         |
| silicalite-silicone                             | 300                     | 1 <sup>c</sup>           | 30               | 0.008                          | 31                                                    | 10        |
| PERVAP-1070d                                    | 29                      | 1 <sup>c</sup>           | 30               | 0.050                          | 44                                                    | 11        |
| silicone                                        | 50                      | 1 <sup>c</sup>           | 30               | 0.528                          | 42                                                    |           |
| silicalite-filled silicone                      | 80                      | 1 <sup>c</sup>           | 70               | 0.610                          | 93                                                    | 12        |
| PDMS                                            | 140                     | 1 <sup>c</sup>           | 50               | 0.132                          | 32                                                    | 13        |
| ZIF-8-filled PMPS                               | 2.5                     | 1 <sup>c</sup>           | 80               | 6.4                            | 34.9                                                  | 14        |
|                                                 |                         | 3 <sup>c</sup>           | 80               | 8.6                            | 40.1                                                  |           |
|                                                 |                         | 5 <sup>b</sup>           | 50               | 2.5                            | 102                                                   |           |
| F-Ag-PD@Al <sub>2</sub> O <sub>3</sub> membrane | 0.2                     | 3 <sup>c</sup>           | 50               | 4.5                            | 136                                                   | This work |
|                                                 |                         | 5 <sup>c</sup>           | 50               | 5                              | 152                                                   |           |
|                                                 |                         | 8 <sup>c</sup>           | 50               | 6.4                            | 150                                                   |           |

<sup>a</sup> Feed alcohol concentration, <sup>b</sup> Ethanol aqueous solution, <sup>c</sup> Butanol aqueous solution.

#### Reference

1. T. Sano, H. Yanagishita, Y. Kiyozumi, F. Mizukami, K. Haraya, *J. Membr. Sci.* 1994, **95**, 221.
2. X. Lin, X. Chen, H. Kita, K. Okamoto, *AIChE J.* 2003, **49**, 237.



3. M. Nomura, T. Yamaguchi, S. Nakao, *J. Membr. Sci.* 1998, **144**, 161.
4. L. Shan, J. Shao, Z. Wang, Y. Yan, *J. Membr. Sci.* 2011, **378**, 319.
5. H. Chen, C. Song, W. Yang, *Microporous Mesoporous Mater.* 2007, **102**, 249.
6. X. Lin, X. Chen, H. Kita, K. Okamoto, *Ind. Eng. Chem. Res.* 2001, **40**, 4069.
7. G. S. Li, V. A. Tuan, J. L. Falconer, R. D. Noble, *Microporous Mesoporous Mater.* 2003, **58**, 137.
8. A. G. Fadeev, Y. A. Selinskaya, S. S. Kelley, M. M. Meagher, E.G. Litvinova, V.S. Khotimsky, V.V. Volkov, *J. Membr. Sci.* 2001, **186**, 205.
9. K. Srinivasan, K. Palanivelu, A. N. Gopalakrishnan, *Chem. Eng.Sci.* 2007, **62**, 2905.
10. N. Qureshi, M. M. Meagher, R.W. Hutkins, *J. Membr. Sci.* 1999, **158**, 115.
11. J. Huang, M. M. Meagher, *J. Membr. Sci.* 1999, **192**, 231.
12. A. Jonquieres, A. Fane, *J. Membr. Sci.* 1997, **125**, 245.
13. S. Li, R. Srivastava, R. S. Parnasa, *J. Membr. Sci.* **2010**, **363**, 287.
14. X. Liu, Y. Li, G. Zhu, Y. Ban, L. Xu, W. Yang, *Angew. Chem. Int. Ed.* 2011, **50**, 10636.
